# Supplementary material
Source: Springer Nature journal article supplement (https://www.springermedizin.de/resource/supplementary/12885_2013_4620_MOESM2_ESM.pdf/9466918)

A

Direct smear  
prior to culture

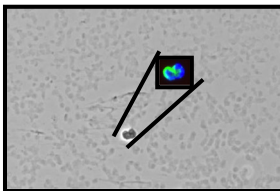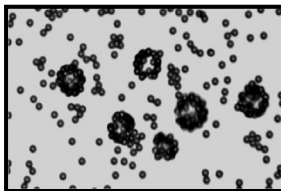

MagSweeper-  
captured DTCs

B

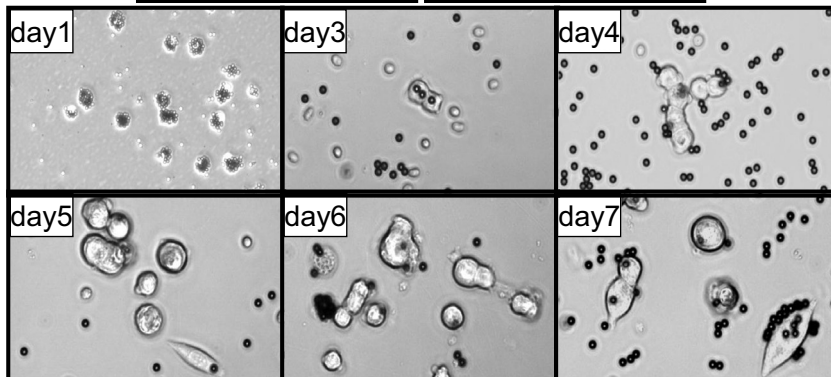

C

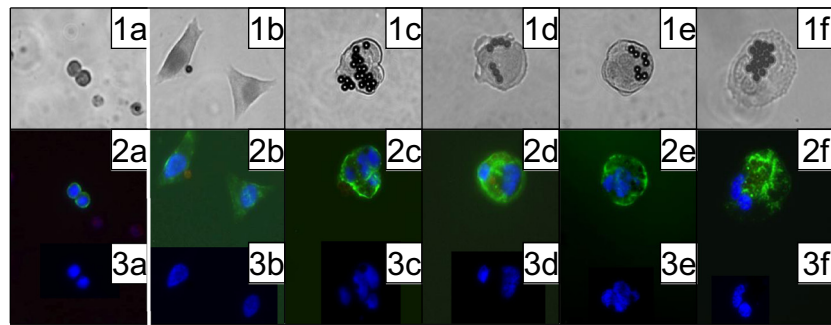

Supplement: MOESM2 [file 9466918]
